# Supplementary material for: An unexpected role for the yeast nucleotide exchange factor Sil1 as a reductant acting on the molecular chaperone BiP
Source: eLife journal article supplement (doi:10.7554/elife.24141), 2017-03-03
Supplement: supp [file elife-24141-supp-v1.zip]

|       |         | C-x <sub>3</sub> -C | C-x <sub>4-8</sub> -C                                                                                   |     |
|-------|---------|---------------------|---------------------------------------------------------------------------------------------------------|-----|
| fungi | mammals | H.sapiens           | MAPQSLPSSRMAPLGLMLGLLMAACFTFCLSHQNN--LKE---FALTNPESSTKETETERKETKAE-----ELDAEVLVFPHTHEWQALQPG            | 82  |
|       |         | M.mulatta           | MALQSLPSSRMAPLATLGLLMAACFTFCLSHQNN--LKE---FALTNPESSTKETETERKETKAE-----ELDAEVLVFPHTHEWQALRPG             | 82  |
|       |         | C.porcillus         | -----MAPFGLMLGLLMTFTFTFCLSHQNN--PNK---FALTSLKSSSTKESKDKDTKVEE-----EMDAEVLVFPHTHEWQALRPG                 | 72  |
|       |         | M.musculus          | MAPOHLPSSTRMASPGMLGLLTSCLTLCLSCQNN--SNN---FALTNPESSTKHQESDTKETREE-----ELDTIELVFPHTHEWQALQPG             | 82  |
|       |         | C.lupus familiaris  | MASQGLPPSRMALLGLMLGLLMAACFTFCLSHQNN--PE---FALTSPESSTKETAEERKDTTAE-----ELDSVLVFPHTHEWQALRPG              | 81  |
|       |         | S.cerevisiae        | -----MVRILPILSLASSKLVASTI--LHS-----SIVSVP--SGGEIISAED--LKELEISGNSIV---DNRVYPKIFEPHWDWQILPG              | 74  |
|       |         | C.albicans          | -----MKFS-----VLVLLAS-----YLVGVN-----SSIVDTSEELICPDPENPLDGYPKLFVPTNEWQTIKPG                             | 55  |
|       |         | K.lactis            | MRVKCVNRAIYVLTVLFSRLLVVSQVVLTPSNSNADPKQKDTANTAAVEANNNDANIAKKDAESDLVIGDHLVGN---TKEGYPIGFVPSIEWKEIRPG     | 96  |
| fungi | mammals | E.gossypii          | -----MY-WKK-----LRFIAIA--SA-AALAAVD--PETEGSELQTIQS---GGGYPRLEFEALQDWSTIKEG                              | 54  |
|       |         | D.hansenii          | -----MKLSKGVLLSLLLT-----LKPIE-----SSIVNTDGLICGA-PNNPTDGYPKIFEPTEWQTIKEG                                 | 58  |
| fungi | mammals | H.sapiens           | QAVPAGSHVRLNLOTGEREAKLQYEDKFRNNL--K---GKRLDINTNT-----YTSODLKSALAKFKEGAEMESSKEDKARQAEVKRLFRPIEELKK       | 169 |
|       |         | M.mulatta           | QAVPAGSHVRLNLOTGEREAKLQSEDKFRNNL--K---GKRLDINTNT-----YTSODLKSALAKFKEGAEMESSKEDKARQAEVKRLFRPIEELKK       | 169 |
|       |         | C.porcillus         | QAVPAGSHVRLNLOTGEREAKLQYEDKFRNNL--RELKKGKRLDINTDT-----YTSODLKSALAKFKEGE--RESSKEDARQAEVKRLFRPIEELKK      | 162 |
|       |         | M.musculus          | QAVPAGSHVRLNLOTGVNEVKLQEDKFRNNL--KGFKRGRRLDINANT-----YTSODLKSALAKFTTEGTEMENSQDELARQATVVKQLFRPIEELKK     | 173 |
|       |         | C.lupus familiaris  | QAVPVSSHVRLNLOTGEREAKLQEDKFRNNL--KGLRKGRRLDINTNT-----YTSODLKSALAKFKEGAEMESSKEDARQAEVKRLFRPIEELKK        | 172 |
|       |         | S.cerevisiae        | QELPGLDRIINMDTGLKEAKLNDEKNVGDNGSHELIVS-----SEDMDKARQAEVKRLFRPIEELKK                                     | 117 |
|       |         | C.albicans          | QDIPPLGLHVRLNIDTLEKEAKLMSADEKDE--PVQEVVVGGELODHSREAIT---ENLQKLHESKHPEVKQ-----EHAHR-----T                | 127 |
|       |         | K.lactis            | QRLPPGLDIRVSLSEKGVREAKLPEPGSENI--GNEEDVKGGLVGAEGSTLSESELKETSDELENEQSGFKLNNAEKESD--ILQQETDKIAIVSD--NAEAT | 193 |
| fungi | mammals | E.gossypii          | QIIPPLGLDIRVSLSTGKQKARLTPNEASNMEN-----GIVQNI                                                            | 91  |
|       |         | D.hansenii          | QDIPAGLHVRLNMENLAREAKILDPSEETE--GSSELMVNAEQNNDQGDNSHQMTNEDQANEIQQKKEFK-----QTQGGK-----S                 | 133 |
| fungi | mammals | H.sapiens           | DFDELNVVLETDMQIMVRLINKFN--SSSSSLEEKIAALFDLEYVYHQMNDNAQDLS---FGGLQVYINGLNSTEPLVKEYAASFVLGAASFSSNPKVQVEA  | 264 |
|       |         | M.mulatta           | DFDELNVVLETDMQIMVRLINKFN--SSSSSLEEKIAALFDLEYVYHQMNDNAQDLS---FGGLQVYINGLNSTEPLVKEYAASFVLGAASFSSNPKVQVEA  | 264 |
|       |         | C.porcillus         | DFDELNVVLETDMQIMVRLINKFN--SSSSSLEEKIAALFDLEYVYHQMNDNAQDLS---FGGLQVYINGLNSTEPLVKEYAASFVLGAASFSSNPKVQVEA  | 257 |
|       |         | M.musculus          | DFDELNVVLETDMQIMVRLINKFN--SSSSSLEEKIAALFDLEYVYHQMNDNAQDLS---FGGLQVYINGLNSTEPLVKEYAASFVLGAASFSSNPKVQVEA  | 268 |
|       |         | C.lupus familiaris  | DFDELNVVLETDMQIMVRLINKFN--SSSSSLEEKIAALFDLEYVYHQMNDNAQDLS---FGGLQVYINGLNSTEPLVKEYAASFVLGAASFSSNPKVQVEA  | 267 |
|       |         | S.cerevisiae        | KASIGYEFSSDPKEMRNIDSNPTLSSQDILARLEDSFORIMEFAHDYKKGKIIITHEFAL--LANUSLNE-NLPLTLRELSTRVITSLRNNPQVVEFI      | 214 |
|       |         | C.albicans          | KVSQGD---LSNFDAAECSELESFK--PHESDVERHLALDITLESHEIDFEGVKLTSDOKAIFOSLVNLAN-G-ASDPKITEKVYRVMGSSLRNNPPEAISNI | 221 |
|       |         | K.lactis            | SNFEPAGHEFSEDFAKIKSLMQSPD---EKTWEEVETLLDDLVFEFAHDYKKGKILSNEFEL--LEYLSFND-TLSIQIRELAARIIVSSLRNNPPSIDFV   | 287 |
| fungi | mammals | E.gossypii          | VDSDDSYFTKFEOLVRAQVASGA---PDYNVVILKQLDDLVYASDYTTLGKYLITHEFTL--LQELIFBQ-DVPISVKELSSRIIVACLNNPTCLDFV      | 184 |
|       |         | D.hansenii          | KVSTVDP---LNDQSSVDEVQHYR--E--GGDANRLSTALDTLILSHDIEFGVKLTQDSSVFRSLVDVSK-S-VQDEDQEKVYRMGSSLRNNPDAVNHV     | 226 |
| fungi | mammals | H.sapiens           | IEGGA-----LQKLLVILA---TEOPLTAKKKVLFALCSLLRHFPYAOQOFL--KLGGLOVRLTLVQEKGT--EVLAVRVVLTLLYDLVTEKMFAGEE      | 349 |
|       |         | M.mulatta           | IEGGA-----LQKLLVILA---TEOPLTAKKKVLFALCSLLRHFPYAOQOFL--KLGGLOVRLSLVQEKGT--EVLAVRVVLTLLYDLVTEKMFAGEE      | 349 |
|       |         | C.porcillus         | IEGGA-----LQKLLVILA---TEOPLTAKKKVLFALCSLLRHFPYAOQOFL--KLGGLOVRLSLVQEKST--EVLAVRVVLTLLYDLVTEKMFAGEE      | 342 |
|       |         | M.musculus          | IEGGA-----LQKLLVILA---TEOPLTAKKKVLFALCSLLRHFPYAOQOFL--KLGGLOVRLSLVQEKSA--KVLAVRVVLTLLYDLVTEKMFAGEE      | 353 |
|       |         | C.lupus familiaris  | IEGGA-----LQKLLVILA---TEOPLTAKKKVLFALCSLLRHFPYAOQOFL--KLGGLOVRLSLVQAKGT--EVLAVRVVLTLLYDLVTEKMFAGEE      | 352 |
|       |         | S.cerevisiae        | NESFPNFKSKIMAAALSNLNS--NHRSSNILLIKRVLISLNLPLVTSEDLPYIST-----VVLQNVYERNNKD-KQLQIKVLELITSKILLKADMYENDP    | 303 |
|       |         | C.albicans          | LTNFDKSY---VDNLFEOQL---AN--ENDVLQKRILGLIQALVQNSHFVRQYFSFDH--SSGLNDLIIAIFPKLGPNSKSRASNLIEDQLQ-LFPVTND--- | 307 |
|       |         | K.lactis            | NKPYQTTFKLCEHLSLEQAS---OGSKLLIKRFLSIDVLLSRTEYVSIK-D-----DVLWRLYQIEDPS---SKIKILEIYAKFYNEKNEQVI--         | 370 |
| fungi | mammals | E.gossypii          | NTRFPDFVRHLQEAIEYGRQATDAVEARQIKRYLSIYEPLLINE--POPIN-E-----EALQLYEVNDQ---VOLKVLMLMARLYKGR---S            | 266 |
|       |         | D.hansenii          | LKNQDATF---VECLFDKLL---DTPASDVIKKRILGIIHALTQNSHFNAKYFNSNNANSAYDSLISVFPSSLESQSQTRLMNILEDKLLGGAGNS---     | 314 |
| fungi | mammals | H.sapiens           | AELTQESPEKLOQYRQVHLLPGLREQGWCEITAHLLALPEH--DAREKVLOTGLVLLTTRDRYRQDPQLGRTLA-SLQAEYQVL-----ASLELOQD       | 440 |
|       |         | M.mulatta           | AELTQETESPEKLOQYRQVHLLPGLREQGWCEITAHLLALPEH--DAREKVLOTGLVLLATCRDHYRQDPQLSRTLA-SLQVEYQAL-----ASLELOQD    | 440 |
|       |         | C.porcillus         | AELTQDMSPEKLOQYRQVHLLPGLREQGWCEITAHLLALPEH--DAREKVLOTGLMATCRDHYREDPELGRTLA-SLQAEYQAL-----AVLELEEG       | 433 |
|       |         | M.musculus          | AELTQDSSPEKLOQYRQVLLPGLREQGWCEITADLLALPEH--DAREKVLOTGLALLTTCRDYRQDQLSRTLG-RLOAEYQAL-----ASLELOQD        | 444 |
|       |         | C.lupus familiaris  | AELTQESPEKLOQYRQVHLLPGLREQGWCEITAHLLALPEH--DAREKVLOTGLALLATCRDHYRQDPQLSRMLV-SLQAEYQAL-----AALELRDQ      | 443 |
|       |         | S.cerevisiae        | TNLI-----LFRNAENWSSNLOEWANEFQ---EMVQNKSIDELHTRTFDITLYNLKKIKESDITINGGFLNWLQAQCKARQSNLDNGAQERT            | 389 |
|       |         | C.albicans          | -----RRSL-----EDODPESQVSKFQNSFVGNK-LDEKNFKSYFDOLVNLHQSNK-SLRPSGDFLNWLAEVEESRKEN--KKRDYSQ                | 383 |
|       |         | K.lactis            | -----DTVQDQDKTVQKWNELT---TIQTPELDELHLRSFPHCISFKITRFKNRVKIDSDFLNWLIDIEIVERNESKDDIKYRDV                   | 449 |
| fungi | mammals | E.gossypii          | HNDD-----ISKRS---LESTDVQRWTTTSL---KAIQSKHLDDFHVRELFHGLYALKKEHGRAKTYPTFLGWLAETEARKQRMQDKQPRDL            | 350 |
|       |         | D.hansenii          | ---N---EK-RAIE---ESADPKSQSYSHFLQHSADSGVA--SEDQFKLYFNKLSEVHSQDK-S-LKPSKAFMEWLSKAELRSKGNKERDSSYTE         | 396 |
| fungi | mammals | H.sapiens           | EDEGYFQELLSGVN-----SLLKELR-----                                                                         | 461 |
|       |         | M.mulatta           | EDEGYFRELLSGSVN-----SLLKELR-----                                                                        | 461 |
|       |         | C.porcillus         | EDEGYFRELLSGSTD-----GLLREL-----                                                                         | 454 |
|       |         | M.musculus          | EDDGYFRELLASIN-----SLMKELR-----                                                                         | 465 |
|       |         | C.lupus familiaris  | EDEGYFRELLSGIN-----SLLKELR-----                                                                         | 464 |
|       |         | S.cerevisiae        | EQDSFDKKLIDSRHLIFGNPMARHRIKNFRDEL-----                                                                  | 421 |
|       |         | C.albicans          | EDKDFDEYMLRARHEVFGNPMGLRKAL-----ADEL                                                                    | 414 |
|       |         | K.lactis            | DQLEFDNOLAKSRHAFVGNPMARLKERLFDDDDTLIADEL                                                                | 490 |
| fungi | mammals | E.gossypii          | EQMEFDRLLIESRHMVFGNPMARHRIKNMEYDEL-----                                                                 | 383 |
|       |         | D.hansenii          | EDRQFDQDLLRARHVFGNPMGLRKAL-----ADEL                                                                     | 427 |

Figure 5 - figure supplement 1
