# Supplementary material for: An unexpected role for the yeast nucleotide exchange factor Sil1 as a reductant acting on the molecular chaperone BiP
Source: eLife journal article supplement (doi:10.7554/elife.24141), 2017-03-03
Supplement: supp [file elife-24141-supp-v1.zip]

Archive with 12 entries (12 files):
- elife_poa_e24141_Figure_2_figure_supplement_1.pdf
- elife_poa_e24141_Figure_5_figure_supplement_2.pdf
- elife_poa_e24141_Figure_5_figure_supplement_1.pdf
- elife_poa_e24141_Figure_4_figure_supplement_1.pdf
- elife_poa_e24141_Figure_1_figure_supplement_1.pdf
- elife_poa_e24141_Figure_2_figure_supplement_3.pdf
- elife_poa_e24141_Figure_3_figure_supplement_1.pdf
- elife_poa_e24141_Figure_2_figure_supplement_2.pdf
- elife_poa_e24141_Figure1_figure_supplement_2.pdf
- elife_poa_e24141_Text_with_Changes_Tracked.doc
- elife_poa_e24141_Figure_2_figure_supplement_5.pdf
- elife_poa_e24141_Figure_2_figure_supplement_4.pdf
