# Supplementary material for: An unexpected role for the yeast nucleotide exchange factor Sil1 as a reductant acting on the molecular chaperone BiP
Source: eLife journal article supplement (doi:10.7554/elife.24141), 2017-03-03
Supplement: supp [file elife-24141-supp-v1.zip › elife_poa_e24141_Figure_5_figure_supplement_2.pdf]

|         |                    |                                                                                                          |                                       |    |
|---------|--------------------|----------------------------------------------------------------------------------------------------------|---------------------------------------|----|
| mammals | H.sapiens          | -----MMKFT--VVAALLLL-----GAVRAEEEDKKEDVGTGVGIDLGTTYS                                                     | CVGVFKNGRVEI IANDQGNRITPSYVAFTPEGERL  | 76 |
|         | M.mulatta          | -----MKLS--LVAAMLLLL-----SAARAEEDKKEDVGTGVGIDLGTTYS                                                      | CVGVFKNGRVEI IANDQGNRITPSYVAFTPEGERL  | 75 |
|         | C.porcillus        | -----MKLC--LVAAVLLLL-----GAARAEEDKKEDVGTGVGIDLGTTYS                                                      | CVGVFKNGRVEI IANDQGNRITPSYVAFTPEGERL  | 75 |
|         | M.musculus         | -----MMKFT--VVAALLLL-----GAVRAEEEDKKEDVGTGVGIDLGTTYS                                                     | CVGVFKNGRVEI IANDQGNRITPSYVAFTPEGERL  | 76 |
|         | C.lupus_familiaris | -----MKLS--LVAAMLLLL-----SAARAEEDKKEDVGTGVGIDLGTTYS                                                      | CVGVFKNGRVEI IANDQGNRITPSYVAFTPEGERL  | 75 |
|         | S.cerevisiae       | MFFNRLSAGKLLVPLSVLLYALFVILPLQNS-FHSSNVLV--RGADNVNYGTVIGIDLGTTYS                                          | CVAVMKNKGTEILANEQGNRITPSYVAFTDD-ERL   | 96 |
|         | C.albicans         | ---MSSQSSWL-PRIGLLYVALVLIPLVSPKHAFAAASDDSDSDNYGTVIGIDLGTTYS                                              | CVGVFMKNKGVEI IANDQGNRITPSYVSFNGD-ERL | 95 |
| fungi   | K.lactis           | MFSARKSSVSWGLVSSLAIFYVLLAVIMPALITGSSSSRVAA--RAADHEDYGTVIGIDLGTTYS                                        | CVAVMKNKGTEILANEQGNRITPSYVSFTDD-ERL   | 97 |
|         | E.gossypii         | MAFGKV--SNWAVPLTALMYAMALVCLPMFAG-G-SRGVYV--AADDAEENYGTVIGIDLGTTYS                                        | CVALMKNKGTEILANEQGNRITPSYVAFTDD-ERL   | 93 |
|         | D.hansenii         | --MLGVNSRFWI--SGFTLAYVLLAVILPLLT-PNQGQALAAEGETDNTESYGTVIGIDLGTTYS                                        | CVGVFMKNKGVEI IANDQGNRITPSYVAFTPE-ERL | 95 |
| mammals | H.sapiens          | IGDAAKNQLTSPNPENTVFDAKRLIGRTWNDPSVQQDIKFLPFKVVVEKTKTPYIQVDIGGGQTKTFAPEEISAMVLTKMKETAAYLGKKVTHAVVTPAY     | 176                                   |    |
|         | M.mulatta          | IGDAAKNQLTSPNPENTVFDAKRLIGRTWNDPSVQQDIKFLPFKVVVEKTKTPYIQVDIGGGQTKTFAPEEISAMVLTKMKETAAYLGKKVTHAVVTPAY     | 175                                   |    |
|         | C.porcillus        | IGDAAKNQLTSPNPENTVFDAKRLIGRTWNDPSVQQDIKFLPFKVVVEKTKTPYIQVDIGGGQTKTFAPEEISAMVLTKMKETAAYLGKKVTHAVVTPAY     | 175                                   |    |
|         | M.musculus         | IGDAAKNQLTSPNPENTVFDAKRLIGRTWNDPSVQQDIKFLPFKVVVEKTKTPYIQVDIGGGQTKTFAPEEISAMVLTKMKETAAYLGKKVTHAVVTPAY     | 176                                   |    |
|         | C.lupus_familiaris | IGDAAKNQLTSPNPENTVFDAKRLIGRTWNDPSVQQDIKFLPFKVVVEKTKTPYIQVDIGGGQTKTFAPEEISAMVLTKMKETAAYLGKKVTHAVVTPAY     | 175                                   |    |
|         | S.cerevisiae       | IGDAAKNQVAANPQNTIFDIKRLIGLKYNDISVQDKIHLPEVNVNKGDKGKPAVEVSVKGEKKVFTPEEISGMILGKMKQIAEDYLGKKVTHAVVTPAY      | 195                                   |    |
|         | C.albicans         | VGDAAKNQAASSNVNNTVFDIKRLIGLKYNDITVQKELKHLPKYIENKGNKPVVKEVYQGEKKFTFSPEEISSMVLGKMKSIADYLGKKVTHAVVTPAY      | 194                                   |    |
| fungi   | K.lactis           | IGDAAKNQAASSNPQNTIFDIKRLIGLKYNDITVQDKIHLPEVNVNKGDKGKPAVEVSVKGEKKVFTPEEISGMILGKMKQIAEDYLGKKVTHAVVTPAY     | 196                                   |    |
|         | E.gossypii         | IGDAAKNQVAANPQNTIFDIKRLIGLKYNDITVQREIKHLPEVVDKNGMPAAVAITVKGGERKFTFSPEEISSMVLGKMKQIAEYLGKKVTHAVVTPAY      | 192                                   |    |
|         | D.hansenii         | IGDAAKNQAASSNVNNTVFDIKRLIGLKYNDIKMVQKEIKHLPEYIDKNGKFPVVKVEFND-ETKFTFSPEEISSMILTKMKSIADYLGKKVTHAVVTPAY    | 194                                   |    |
| mammals | H.sapiens          | FNDAQRQATKDAGTIAGLNVMRIINEPTAAAIAYGLDKREGEKNILVFDLGGGTFDVSLLTIDNGVFEVVATNGDTHLGGEDFDQRVMEHFIKLYKKKTG     | 276                                   |    |
|         | M.mulatta          | FNDAQRQATKDAGTIAGLNVMRIINEPTAAAIAYGLDKREGEKNILVFDLGGGTFDVSLLTIDNGVFEVVATNGDTHLGGEDFDQRVMEHFIKLYKKKTG     | 275                                   |    |
|         | C.porcillus        | FNDAQRQATKDAGTIAGLNVMRIINEPTAAAIAYGLDKREGEKNILVFDLGGGTFDVSLLTIDNGVFEVVATNGDTHLGGEDFDQRVMEHFIKLYKKKTG     | 275                                   |    |
|         | M.musculus         | FNDAQRQATKDAGTIAGLNVMRIINEPTAAAIAYGLDKREGEKNILVFDLGGGTFDVSLLTIDNGVFEVVATNGDTHLGGEDFDQRVMEHFIKLYKKKTG     | 276                                   |    |
|         | C.lupus_familiaris | FNDAQRQATKDAGTIAGLNVMRIINEPTAAAIAYGLDKREGEKNILVFDLGGGTFDVSLLTIDNGVFEVVATNGDTHLGGEDFDQRVMEHFIKLYKKKTG     | 275                                   |    |
|         | S.cerevisiae       | FNDAQRQATKDAGTIAGLNVLRIVNEPTAAAIAYGLDKSDKEHQIIVYDLGGGTFDVSLLSIENGVEVQATSGDTHLGGEDFDYKIVRQLKAFKKKHG       | 295                                   |    |
|         | C.albicans         | FNDAQRQATKDAGTIAGLNVLRIVNEPTAAAIAYGLDKGQDEKQIIVYDLGGGTFDVSLLSIEGGVFEVLATAGDTHLGGEDFDKIVRYLAKQFKKKHN      | 294                                   |    |
| fungi   | K.lactis           | FNDAQRQATKDAGTIAGLNLIRIVNEPTAAAIAYGLDKTEDEHQIIVYDLGGGTFDVSLLSIENGVEVQATAGDTHLGGEDFDYKIVRHFKAQLQKKHD      | 296                                   |    |
|         | E.gossypii         | FNDAQRQATKDAGTIAGLNLIRIVNEPTAAAIAYGLDKTEDEHQIIVYDLGGGTFDVSLLSIENGVEVQATAGDTHLGGEDFDYKIVRHFKAQLQKKKHG     | 292                                   |    |
|         | D.hansenii         | FNDAQRQATKDAGTIAGLNVLRIVNEPTAAAIAYGLDKTEGEKQIIVYDLGGGTFDVSLLSIEGGVFEVLATAGDTHLGGEDFDKIVRYLSSVFKKKHN      | 294                                   |    |
| mammals | H.sapiens          | KDVRKDNRAVQKLRREVEAKAKRALSSQHQARIEIESFYEGEDFSETLTRAKEEELNMDLFRSTMKPVQKVLSDSLKKSDDIDEIVLVGGSTRIPKIQQLV    | 376                                   |    |
|         | M.mulatta          | KDVRKDNRAVQKLRREVEAKAKRALSSQHQARIEIESFYEGEDFSETLTRAKEEELNMDLFRSTMKPVQKVLSDSLKKSDDIDEIVLVGGSTRIPKIQQLV    | 375                                   |    |
|         | C.porcillus        | KDVRKDNRAVQKLRREVEAKAKRALSSQHQARIEIESFYEGEDFSETLTRAKEEELNMDLFRSTMKPVQKVLSDSLKKSDDIDEIVLVGGSTRIPKIQQLV    | 376                                   |    |
|         | M.musculus         | KDVRKDNRAVQKLRREVEAKAKRALSSQHQARIEIESFYEGEDFSETLTRAKEEELNMDLFRSTMKPVQKVLSDSLKKSDDIDEIVLVGGSTRIPKIQQLV    | 376                                   |    |
|         | C.lupus_familiaris | KDVRKDNRAVQKLRREVEAKAKRALSSQHQARIEIESFYEGEDFSETLTRAKEEELNMDLFRSTMKPVQKVLSDSLKKSDDIDEIVLVGGSTRIPKIQQLV    | 375                                   |    |
|         | S.cerevisiae       | IDVSDNNKALAKKREAEAKAKRALSSQMSSTRIEIDSFVGGIDFSETLTRAKEEELNLDLFKKTLPKVEKVLQDSGLEKKQVDDIVLVGGSTRIPKIQQLV    | 395                                   |    |
|         | C.albicans         | IDITANSKAIISKLKREAEAKAKRALSSQMSSTRIEIDSFVGGIDFSETLTRAKEEELNIAAFKKTLPKVEKVLQDSGLEKKQVDDIVLVGGSTRIPKIQQLV  | 396                                   |    |
| fungi   | K.lactis           | LDVTKNDKAMAKLKREAEAKAKRALSSQMSSTRIEIDSFVGGIDFSETLTRAKEEELNALFKKTLPKVEKVLQDSGLEKKQVDDIVLVGGSTRIPKIQQLV    | 394                                   |    |
|         | E.gossypii         | VDVSSNAKAMAKLKREAEAKAKRALSSQMSSTRIEIDSFVGGIDFSETLTRAKEEELNLDLFKKTLPKVEKVLQDSGLEKKQVDDIVLVGGSTRIPKIQQLV   | 392                                   |    |
|         | D.hansenii         | IDITSGNSKAIISKLKRETEAKAKRALSSQMSSTRIEIDSFVGGIDFSETLTRAKEEELNIESFKKTLPKVEKVLQDSGLEKKQVDDIVLVGGSTRIPKIQQLV | 394                                   |    |
| mammals | H.sapiens          | KEFFNGKEPSRGINPDEAVAYGAAVQAGVLSGDQDGTDLVLLDVCPPLTLGIEVGGVMTKLIPRNTVVPTKKSQIFSTASDNQPTVTIKVYEGERPLTKD     | 476                                   |    |
|         | M.mulatta          | KEFFNGKEPSRGINPDEAVAYGAAVQAGVLSGDQDGTDLVLLDVCPPLTLGIEVGGVMTKLIPRNTVVPTKKSQIFSTASDNQPTVTIKVYEGERPLTKD     | 475                                   |    |
|         | C.porcillus        | KEFFNGKEPSRGINPDEAVAYGAAVQAGVLSGDQDGTDLVLLDVCPPLTLGIEVGGVMTKLIPRNTVVPTKKSQIFSTASDNQPTVTIKVYEGERPLTKD     | 475                                   |    |
|         | M.musculus         | KEFFNGKEPSRGINPDEAVAYGAAVQAGVLSGDQDGTDLVLLDVCPPLTLGIEVGGVMTKLIPRNTVVPTKKSQIFSTASDNQPTVTIKVYEGERPLTKD     | 476                                   |    |
|         | C.lupus_familiaris | KEFFNGKEPSRGINPDEAVAYGAAVQAGVLSGDQDGTDLVLLDVCPPLTLGIEVGGVMTKLIPRNTVVPTKKSQIFSTASDNQPTVTIKVYEGERPLTKD     | 475                                   |    |
|         | S.cerevisiae       | ESYFDGKKASKGINPDEAVAYGAAVQAGVLSGEEGVDDIVLLDVNALTGLIETTGGVMTPLIKRNTAIPTKKSQIFSTAVDNOQPTVLIKVYEGERAMSKD    | 495                                   |    |
|         | C.albicans         | EGFFDGGKASKGINPDEAVAYGAAVQAGVLSGEEGVDDIVLLDVNALTGLIETTGGVMTPLIKRNTAIPTKKSQIFSTADNOQPTVLIKVYEGERTMAKD     | 494                                   |    |
| fungi   | K.lactis           | EKFFNGKKASKGINPDEAVAYGAAVQAGVLSGEEGVDDIVLLDVNALTGLIETTGGVMTPLIKRNTAIPTKKSQIFSTAVDNOQPTVLIKVYEGERAMSKD    | 496                                   |    |
|         | E.gossypii         | ENFFNKKASKGINPDEAVAYGAAVQAGVLSGEEGVDDIVLLDVNPLTLGIEVGGIMTPLIKRNTAIPTKKSQIFSTAVDNOQPTVLIKVYEGERTMAKD      | 491                                   |    |
|         | D.hansenii         | EKFFDGGKASKGINPDEAVAYGAAVQAGVLSGEEGVDDIVLLDVNPLTLGIEVGGVMTPLIKRNTAIPTKKSQIFSTADNOQPTVLIKVYEGERTMAKD      | 494                                   |    |
| mammals | H.sapiens          | NHLLGTFDLTGIPAPRGVPQIEVTFEIDVNGILRVTAEDKGTGNKNKITITNDQNRILTPEEIERMVNDAEKFAEEDKKLKERIDTRNELESYAYS LNKO    | 576                                   |    |
|         | M.mulatta          | NHLLGTFDLTGIPAPRGVPQIEVTFEIDVNGILRVTAEDKGTGNKNKITITNDQNRILTPEEIERMVNDAEKFAEEDKKLKERIDTRNELESYAYS LNKO    | 575                                   |    |
|         | C.porcillus        | NHLLGTFDLTGIPAPRGVPQIEVTFEIDVNGILRVTAEDKGTGNKNKITITNDQNRILTPEEIERMVNDAEKFAEEDKKLKERIDTRNELESYAYS LNKO    | 576                                   |    |
|         | M.musculus         | NHLLGTFDLTGIPAPRGVPQIEVTFEIDVNGILRVTAEDKGTGNKNKITITNDQNRILTPEEIERMVNDAEKFAEEDKKLKERIDTRNELESYAYS LNKO    | 575                                   |    |
|         | C.lupus_familiaris | NHLLGTFDLTGIPAPRGVPQIEVTFEIDVNGILRVTAEDKGTGNKNKITITNDQNRILTPEEIERMVNDAEKFAEEDKKLKERIDTRNELESYAYS LNKO    | 575                                   |    |
|         | S.cerevisiae       | NNLLGKFELTGIPAPRGVPQIEVTFALDANGILKVSATDKGTGKSESITITNDQNRILTPEEIERMVNDAEKFAEEDKKLKERIDTRNELESYAYS LNKO    | 595                                   |    |
|         | C.albicans         | NNRLGKFELTGIPAPRGVPQIEVTFSLDANGILKVEAADKGTGKSESITITNEKGRLSKQIEDRMVIEAEKFAEEDKKLKERIDTRNELESYAYS LNKO     | 594                                   |    |
| fungi   | K.lactis           | NNLGNFELSDIRAPRGVPQIEVTFALDANGILTVAATDKGTGKSESITITANDKGRLSQDDIDRMVIEAEKFAEEDKKLKERIDTRNELESYAYS LNKO     | 596                                   |    |
|         | E.gossypii         | NNHLGKFELSGIPAPRGIPQIEVTFALDANGILKVSATDKGTGKSESITITNEKGRLSKQIEDRMVIEAEENYQKDEEITRAKVEARHLENYAYS LNKO     | 591                                   |    |
|         | D.hansenii         | NNLKGKFELTSIPAPRGVPQIEVTFSLDANGILKVEAADKGTGKSESITITNDKGRLSKQIEDRMVIEAEKYAEQDSLEKAKIESRNLLENYAHMLKSG      | 594                                   |    |
| mammals | H.sapiens          | IGDK--EKLGGKLSSSEDKETMEKAVEEKIEWLESHQDADIEDFAKKKKELEEIVQPIISKLYGSAGPPPTGEEDT-----SEKDEL-----             | 655                                   |    |
|         | M.mulatta          | IGDK--EKLGGKLSSSEDKETMEKAVEEKIEWLESHQDADIEDFAKKKKELEEIVQPIISKLYGSAGPPPTGEEDT-----AEKDEL-----             | 654                                   |    |
|         | C.porcillus        | IGDK--EKLGGKLSSSEDKETMEKAVEEKIEWLESHQDADIEDFAKKKKELEEIVQPIISKLYGSAGPPPTGEEDT-----AEKDEL-----             | 654                                   |    |
|         | M.musculus         | IGDK--EKLGGKLSSSEDKETMEKAVEEKIEWLESHQDADIEDFAKKKKELEEIVQPIISKLYGSAGPPPTGEEDT-----SEKDEL-----             | 655                                   |    |
|         | C.lupus_familiaris | IGDK--EKLGGKLSSSEDKETMEKAVEEKIEWLESHQDADIEDFAKKKKELEEIVQPIISKLYGSAGPPPTGEEDT-----ADKDEL-----             | 654                                   |    |
|         | S.cerevisiae       | VN----GDLGEKEEEDKETLDAANDVLEWLDNDFETAIADFDKFFESISKVAYPIISKLYGGAAGSGAA--DYDDEDEDDGDYFEHDEL                | 682                                   |    |
|         | C.albicans         | LSDTSETGLGSKLDDDDKETLDDAKETLEFIEDONFDATAAEFEQKQLIDVANIPTAKLYGGAAGGAGAGGAGDAKFGDDSDDEFHDEL                | 687                                   |    |
| fungi   | K.lactis           | VN----GELAEIMDEDDKETVLDNVNESLEWLEDNSDVAEAEEDFEKMASFKESVPIIAKASASQGS---T--SGEGFDEDDDDYFDEL                | 679                                   |    |
|         | E.gossypii         | VN----GDLGDKLEEEDKETLDAANDVLEWLEDNSDSATKEEFNEKFESISQTAYPIISKLYGAGA---S--DATDDEDDSDYFDEL                  | 674                                   |    |
|         | D.hansenii         | VKDESENGLGSKLDDDDKETLDDAKETLEFIEDNYDSATSEEFEEQKQLIDVASPITISKLYGG---AGGADEAQFGDDSDDEFVHDEL                | 683                                   |    |

Figure 5 - figure supplement 2
