# Supplementary figures and images for: An unexpected role for the yeast nucleotide exchange factor Sil1 as a reductant acting on the molecular chaperone BiP
Source: eLife journal article supplement (doi:10.7554/elife.24141), 2017-03-03

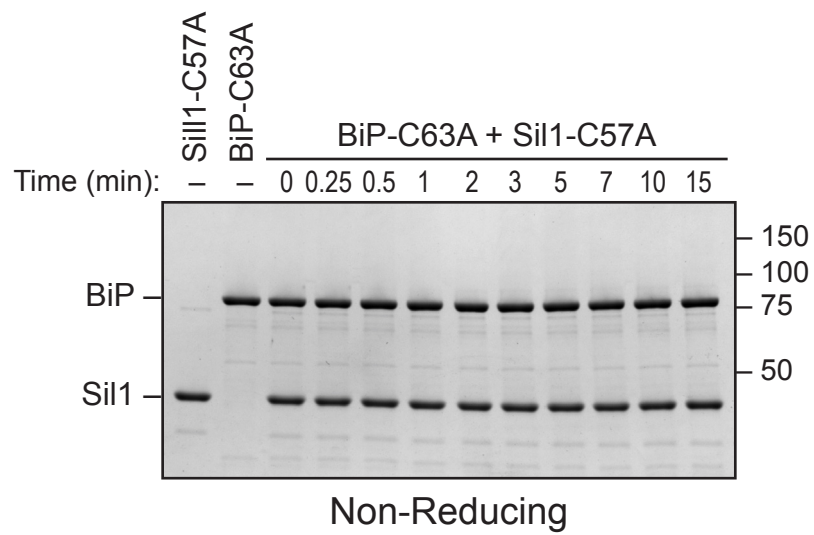

Figure 2 - figure supplement 3

Supplement: supp [file elife-24141-supp-v1.zip]

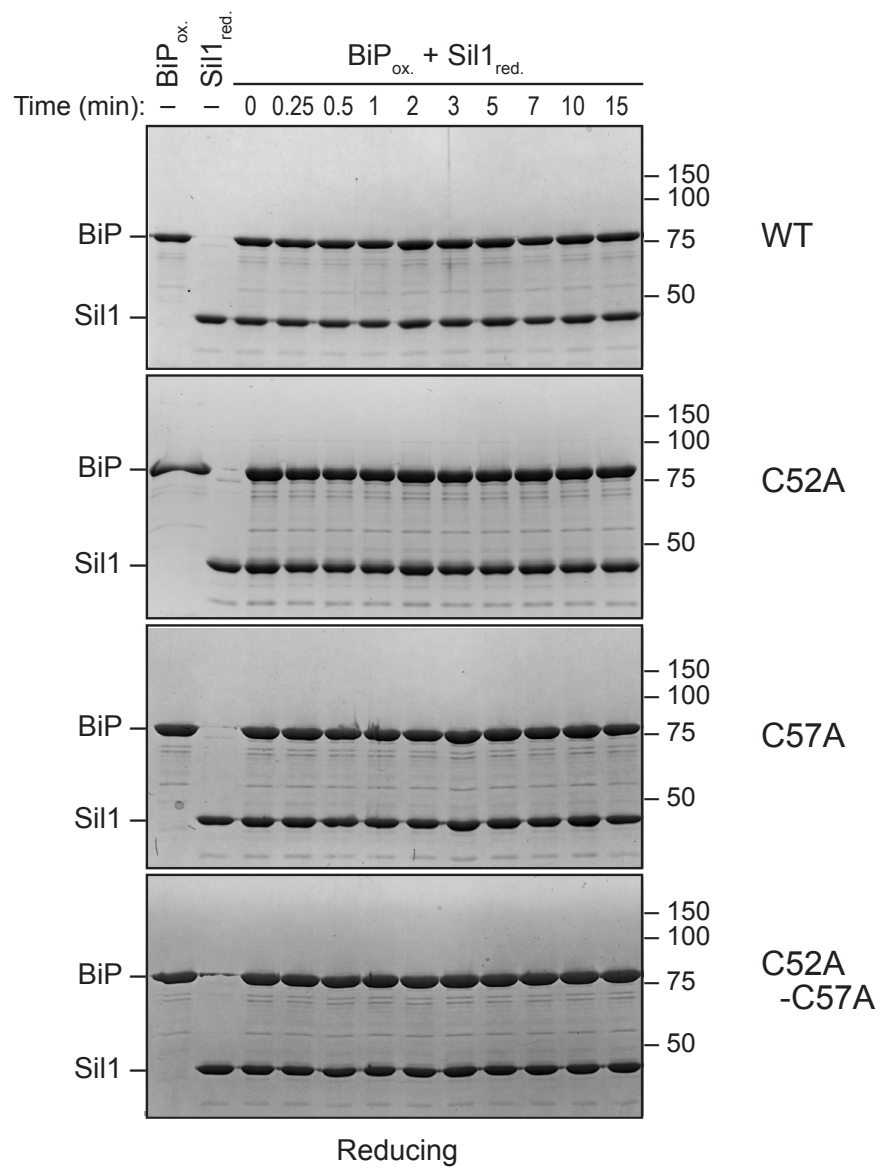

Figure 2 - figure supplement 2

Supplement: supp [file elife-24141-supp-v1.zip]

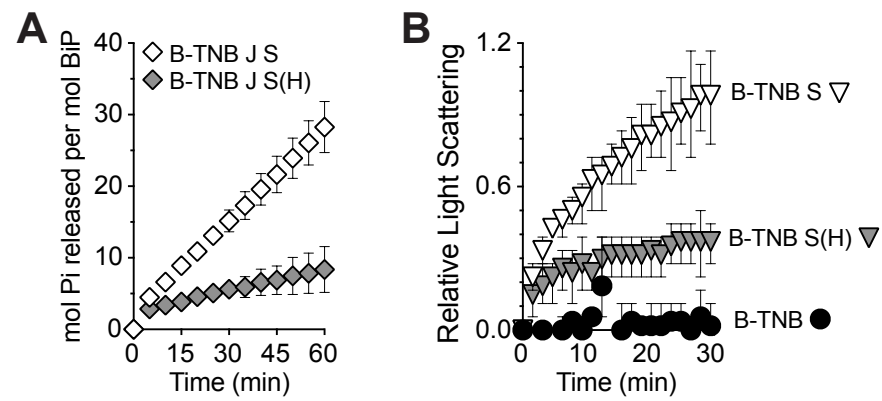

Figure 4 - figure supplement 1

Supplement: supp [file elife-24141-supp-v1.zip]

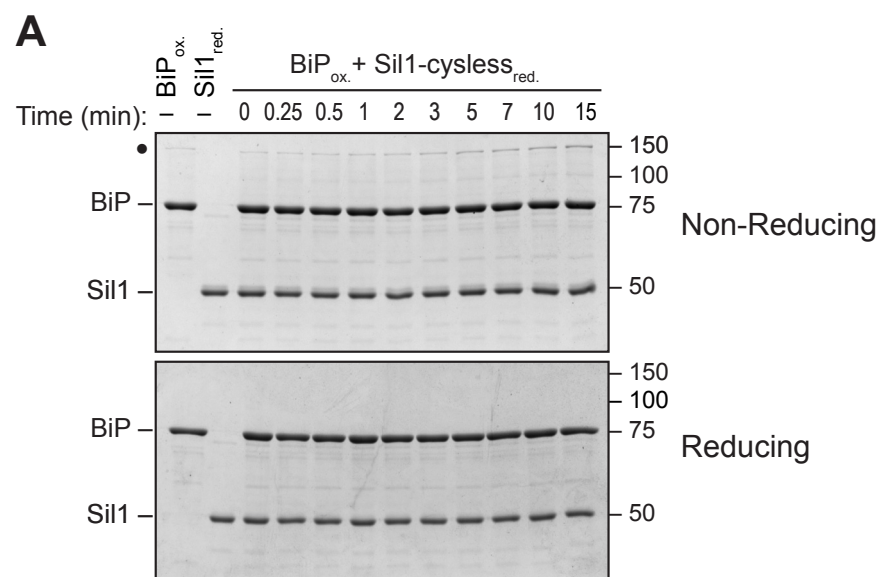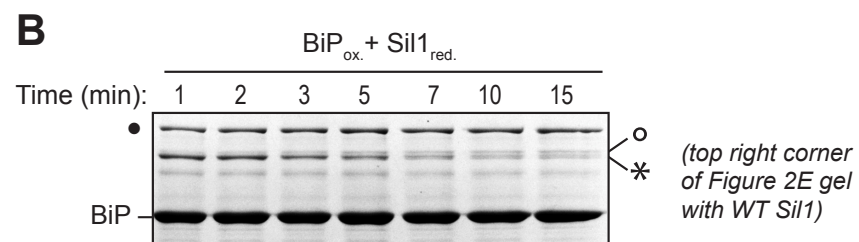

Figure 2 - figure supplement 4

Supplement: supp [file elife-24141-supp-v1.zip]

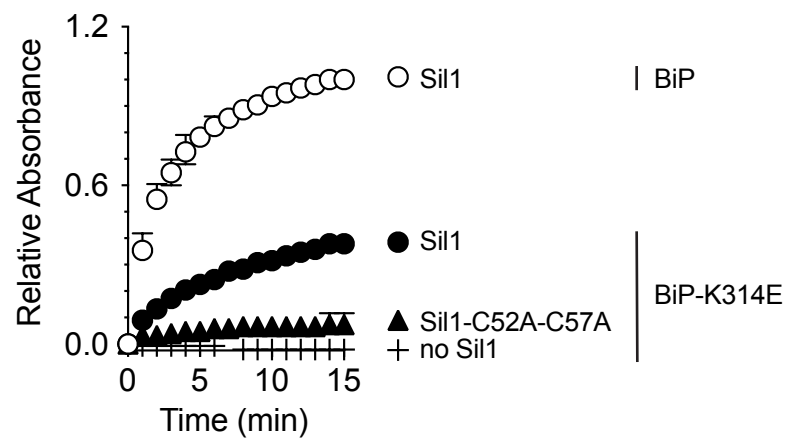

Figure 2 - figure supplement 1

Supplement: supp [file elife-24141-supp-v1.zip]

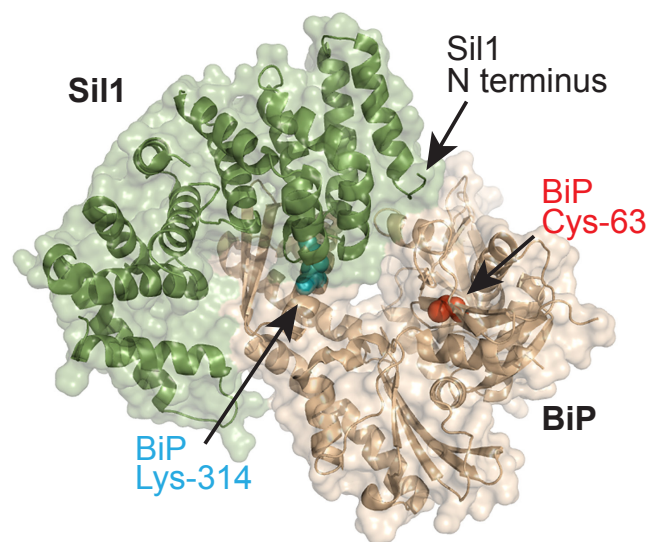

Figure 1 - figure supplement 1

Supplement: supp [file elife-24141-supp-v1.zip]

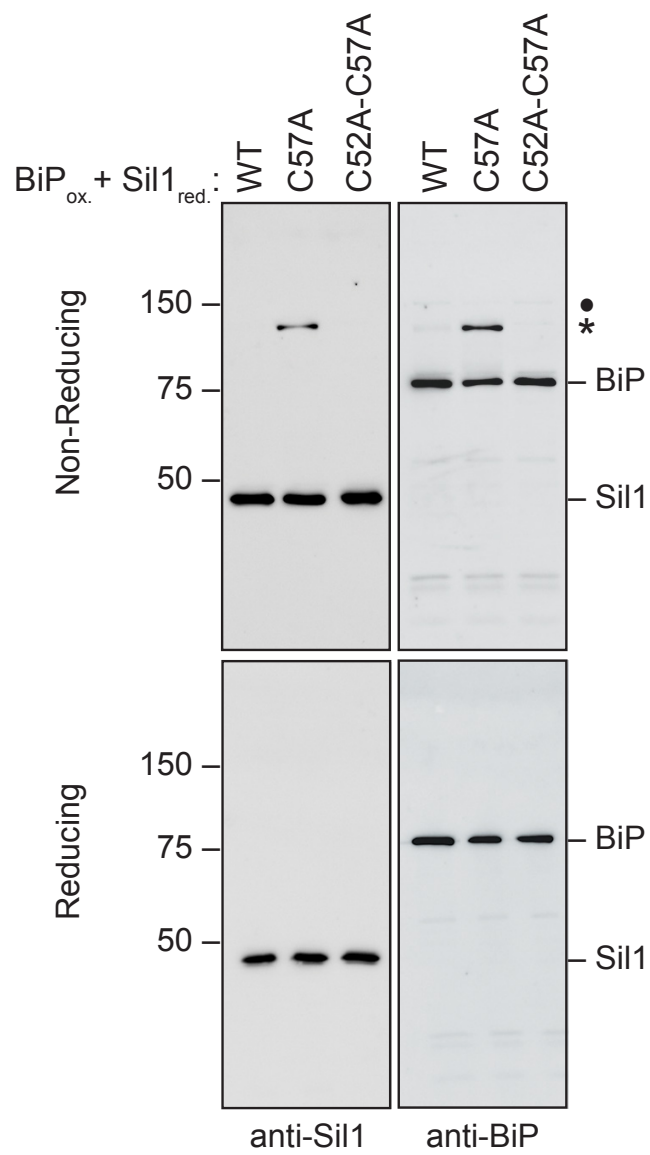

Figure 2 - figure supplement 5

Supplement: supp [file elife-24141-supp-v1.zip]

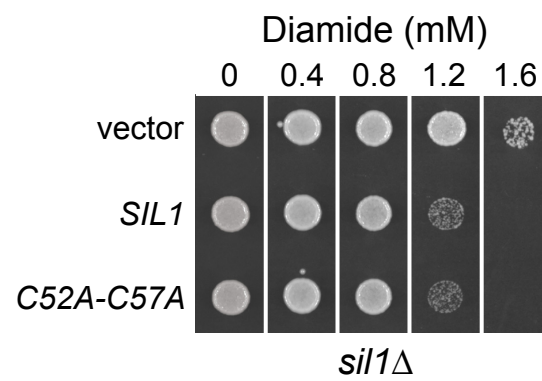

Figure 3 - figure supplement 1

Supplement: supp [file elife-24141-supp-v1.zip › elife_poa_e24141_Figure_3_figure_supplement_1.pdf]

**A**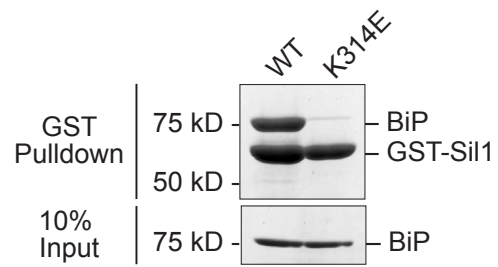**B**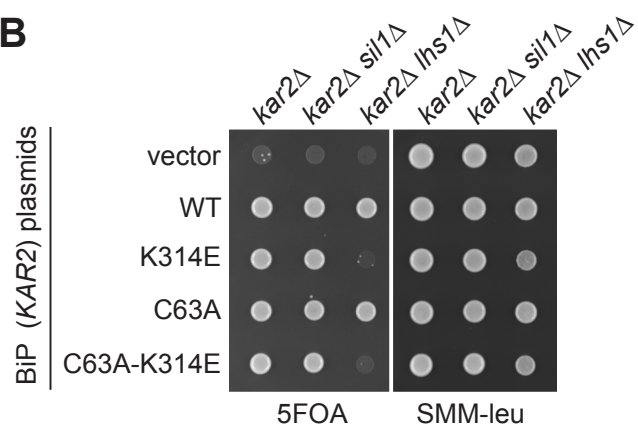

Supplement: supp [file elife-24141-supp-v1.zip › elife_poa_e24141_Figure1_figure_supplement_2.pdf]
